# Supplementary material
Source: PubMed Central journal article supplement (PMC1278947)
Supplement: nar_33_19_6445__1.pdf [file nar_33_19_6445__1.pdf]

## Supplemental figure legend

**Supplemental Figure S1.** Graphic representation of *gsp* operons from various Gram-negative bacteria. Orthologs are indicated by same colour code. The identity/similarity (%) of the homologous gene products to those of Sd197 is shown in the parentheses below each ORF.
