# Supplementary material
Source: PubMed Central journal article supplement (PMC1278947)
Supplement: nar_33_19_6445__2.pdf [file nar_33_19_6445__2.pdf]

**Table S1.** Pseudogenes within the ~3 Mb common backbone sequence in *Shigella* genomes and the counterparts in MG1655. (\* pseudogenes)

| MG1655 | Sd197    | Sf301   | Sb227    | Ss046    | Gene | Product                                                                                              |
|--------|----------|---------|----------|----------|------|------------------------------------------------------------------------------------------------------|
| b0007  | SDY0007  | SF0007* | SBO0008* | SSO0008* | yaaJ | inner membrane transport protein                                                                     |
| b0045  | SDY0067  | SF0042  | SBO0034  | SSO0053* | yaaU | putative transport protein                                                                           |
| b0060  | SDY0087* | SF0055  | SBO0047  | SSO0066  | polB | DNA polymerase II                                                                                    |
| b0062  | SDY0089  | SF0057* | SBO0049  | SSO0068  | araA | L-arabinose isomerase                                                                                |
| b0064  | SDY0091* | SF0059  | SBO0051  | SSO0070  | araC | transcriptional regulator for ara operon                                                             |
| b0106  | SDY0136* | SF0103  | SBO0094  | SSO0114  | hofC | putative integral membrane protein involved in biogenesis of fimbriae, protein transport, DNA uptake |
| b0108  | SDY0138  | SF0105  | SBO0097* | SSO0116  | ppdD | prelipin peptidase dependent protein                                                                 |
| b0124  | SDY0033* | SF0121  | SBO0113  | SSO0132  | gcd  | glucose dehydrogenase                                                                                |
| b0130  | SDY0040  | SF0127  | SBO0119* | SSO0138  | yadE | orf, hypothetical protein                                                                            |
| b0148  | SDY0164* | SF0140  | SBO0137  | SSO0160  | hrpB | helicase, ATP-dependent                                                                              |
| b0160  | SDY0176* | SF0152  | SBO0149  | SSO0172* | dgt  | deoxyguanosine triphosphate triphosphohydrolase                                                      |
| b0162  | SDY0179  | SF0154* | SBO0151  | SSO0175  | yaeG | orf, hypothetical protein                                                                            |
| b0186  | SDY0204* | SF0176  | SBO0174* | SSO0199  | ldcC | lysine decarboxylase 2, constitutive                                                                 |
| b0191  | SDY0210  | SF0182  | SBO0180  | SSO0205* | yaeJ | orf, hypothetical protein                                                                            |
| b0221  | SDY0247* | SF0271  | SBO0212* | SSO0263  | yafH | putative acyl-CoA dehydrogenase (EC 1.3.99.-)                                                        |
| b0383  | SDY0361* | SF0230  | SBO0278  | SSO0358  | phoA | alkaline phosphatase                                                                                 |
| b0394  | SDY0345  | SF0330  | SBO0288* | SSO0371  | yajF | possible NAGC-like transcriptional regulator                                                         |
| b0396  | SDY0342* | SF0333  | SBO0290  | SSO0373  | araJ | involved in either transport or processing of arabinose polymers                                     |
| b0398  | SDY0339* | SF0335  | SBO0292  | SSO0375  | sbcD | ATP-dependent dsDNA exonuclease                                                                      |
| b0400  | SDY0337* | SF0337  | SBO0294  | SSO0377  | phoR | positive and negative sensor protein for pho regulon                                                 |
| b0403  | SDY0334* | SF0340  | SBO0297* | SSO0380  | malZ | maltodextrin glucosidase                                                                             |
| b0453  | SDY0390* | SF0398  | SBO0348  | SSO0441  | ybaY | glycoprotein/polysaccharide metabolism                                                               |
| b0458  | SDY0461  | SF0403  | SBO0358* | SSO0445  | ylaC | orf, hypothetical protein                                                                            |
| b0459  | SDY0460  | SF0404* | SBO0359  | SSO0446  | ylaD | putative transferase                                                                                 |
| b0476  | SDY0443* | SF0421  | SBO0376  | SSO0463  | ybaC | putative lipase (EC 3.1.1.-)                                                                         |
| b0479  | SDY0439* | SF0424  | SBO0381* | SSO0468  | fsr  | fosmidomycin resistance protein                                                                      |
| b0485  | SDY0433* | SF0430  | SBO0387  | SSO0474  | ybaS | putative glutaminase                                                                                 |
| b0492  | SDY0407  | SF0437  | SBO0394* | SSO0481  | ybbN | putative thioredoxin-like protein                                                                    |

| MG1655 | Sd197    | Sf301   | Sb227    | Ss046    | Gene | Product                                                           |
|--------|----------|---------|----------|----------|------|-------------------------------------------------------------------|
| b0494  | SDY0404  | SF0440* | SBO0397  | SSO0484  | tesA | acyl-CoA thioesterase I; also functions as protease I             |
| b0496  | SDY0403* | SF0441  | SBO0398* | SSO0485  | ybbP | putative oxidoreductase                                           |
| b0504  | SDY0398  | SF0443  | SBO0408* | SSO0487* | ybbS | putative transcriptional regulator LYSR-type                      |
| b0521  | SDY0271* | SF0452  | SBO0422* | SSO0497  | arcC | putative carbamate kinase (EC 2.7.2.2)                            |
| b0578  | SDY0491  | SF0485* | SBO0439  | SSO0529  | nfnB | oxygen-insensitive NAD(P)H nitroreductase                         |
| b0580  | SDY0493  | SF0487  | SBO0441  | SSO0531* | ybdJ | orf, hypothetical protein                                         |
| b0587  | SDY0518  | SF0501* | SBO0448  | SSO0538  | fepE | ferric enterobactin (enterochelin) transport                      |
| b0593  | SDY0524  | SF0507* | SBO0454  | SSO0544  | entC | isochorismate hydroxymutase 2, enterochelin biosynthesis          |
| b0598  | SDY0529* | SF0512  | SBO0459  | SSO0549  | cstA | carbon starvation protein                                         |
| b0600  | SDY0532  | SF0515  | SBO0462* | SSO0552  | ybdL | putative aminotransferase                                         |
| b0602  | SDY0537  | SF0521* | SBO0463  | SSO0554* | ybdN | orf, hypothetical protein                                         |
| b0604  | SDY0539* | SF0523  | SBO0469* | SSO0556  | dsbG | thiol:disulfide interchange protein                               |
| b0638  | SDY0560* | SF0643  | SBO0502* | SSO0592  | phpB | homolog of Salmonella cobC, a phosphohistidine protein            |
| b0654  | SDY0589* | SF0627  | SBO0517  | SSO0608  | gltJ | glutamate/aspartate transport system permease                     |
| b0675  | SDY0609  | SF0618* | SBO0537  | SSO0629  | nagD | N-acetylglucosamine metabolism                                    |
| b0694  | SDY0629  | SF0601* | SBO0556  | SSO0645  | kdpE | regulator of kdp operon (transcriptional effector)                |
| b0695  | SDY0630* | SF0600* | SBO0557  | SSO0646  | kdpD | sensor for high-affinity potassium transport system               |
| b0696  | SDY0631  | SF0602  | SBO0558* | SSO0647  | kdpC | high-affinity potassium transport system                          |
| b0697  | SDY0632* | SF0599* | SBO0559  | SSO0648  | kdpB | ATPase of high-affinity potassium transport system, B chain       |
| b0698  | SDY0633* | SF0598  | SBO0560  | SSO0649  | kdpA | ATPase of high-affinity potassium transport system, A chain       |
| b0709  | SDY0644* | SF0588  | SBO0568  | SSO0660  | ybgH | putative transport protein                                        |
| b0712  | SDY0647  | SF0585* | SBO0571  | SSO0663  | ybgK | putative carboxylase                                              |
| b0750  | SDY0694  | SF0554  | SBO0605  | SSO0700* | nadA | quinolinate synthetase, A protein                                 |
| b0788  | SDY0815  | SF0738  | SBO0676  | SSO0767* | ybhN | orf, hypothetical protein                                         |
| b0789  | SDY0814  | SF0739  | SBO0677* | SSO0768  | ybhO | putative synthetase                                               |
| b0790  | SDY0813  | SF0740  | SBO0678* | SSO0769  | ybhP | orf, hypothetical protein                                         |
| b0806  | SDY0791  | SF0757  | SBO0696* | SSO0786  | ybiM | orf, hypothetical protein                                         |
| b0813  | SDY0782* | SF0764  | SBO0704  | SSO0793  | ybiF | putative transmembrane subunit                                    |
| b0839  | SDY0841  | SF0789  | SBO0735* | SSO0822* | dacC | D-alanyl-D-alanine carboxypeptidase; penicillin-binding protein 6 |
| b0842  | SDY0844* | SF0795  | SBO0738  | SSO0827* | cmr  | proton motive force efflux pump                                   |

| MG1655 | Sd197    | SF301   | Sb227    | Ss046    | Gene | Product                                                                           |
|--------|----------|---------|----------|----------|------|-----------------------------------------------------------------------------------|
| b0860  | SDY2408* | SF0814  | SBO0794  | SSO0845  | artJ | arginine 3rd transport system periplasmic binding protein                         |
| b0895  | SDY2366* | SF0854  | SBO0828* | SSO0896  | dmsB | anaerobic dimethyl sulfoxide reductase subunit B                                  |
| b0909  | SDY2349  | SF0905  | SBO2197* | SSO0911  | ycaL | putative heat shock protein                                                       |
| b0913  | SDY2345  | SF0909* | SBO2201  | SSO0915  | ycaI | orf, hypothetical protein                                                         |
| b0933  | SDY2324  | SF0930  | SBO2224* | SSO0936  | ycbE | putative ATP-binding component of a transport system                              |
| b0934  | SDY2323  | SF0931  | SBO2225* | SSO0937  | ycbM | putative transport system permease protein                                        |
| b0958  | SDY0933* | SF0958  | SBO2273  | SSO0962  | sulA | suppressor of lon; inhibits cell division and ftsZ ring formation                 |
| b0974  | SDY0949  | SF0975  | SBO2257  | SSO0980* | hyaC | probable Ni/Fe-hydrogenase 1 b-type cytochrome subunit                            |
| b0977  | SDY0952* | SF0978  | SBO2254  | SSO0983  | hyaF | nickel incorporation into hydrogenase-1 proteins                                  |
| b0992  | SDY0966  | SF0994  | SBO2239  | SSO1000* | yccM | orf, hypothetical protein                                                         |
| b0993  | SDY0967* | SF0995  | SBO2238  | SSO1001  | torS | sensor protein torS (regulator TorR)                                              |
| b0996  | SDY0970* | SF0997  | SBO2235  | SSO1004  | torC | trimethylamine N-oxide reductase, cytochrome c-type subunit                       |
| b0997  | SDY0971* | SF0999* | SBO2234* | SSO1005* | torA | trimethylamine N-oxide reductase subunit                                          |
| b0998  | SDY0972  | SF1000* | SBO2233  | SSO1006* | torD | part of trimethylamine-N-oxide oxidoreductase                                     |
| b1033  | SDY1004  | SF1027* | SBO2035  | SSO1042  | ycdW | putative dehydrogenase                                                            |
| b1037  | SDY0999  | SF1031* | SBO2031* | SSO1046  | csgG | curli production assembly/transport component, 2nd curli operon                   |
| b1040  | SDY0996* | SF1034  | SBO2028  | SSO1050* | csgD | putative 2-component transcriptional regulator for 2nd curli operon               |
| b1049  | SDY2301  | SF1045  | SBO2017* | SSO1062  | mdoH | membrane glycosyltransferase; synthesis of membrane-derived oligosaccharide (MDO) |
| b1070  | SDY2082* | SF1076  | SBO1994  | SSO1090  | flgN | protein of flagellar biosynthesis                                                 |
| b1077  | SDY2074* | SF1081* | SBO1987  | SSO1097  | flgF | flagellar biosynthesis, cell-proximal portion of basal-body rod                   |
| b1078  | SDY2073* | SF1082  | SBO1986  | SSO1098* | flgG | flagellar biosynthesis, cell-distal portion of basal-body rod                     |
| b1081  | SDY2070  | SF1085  | SBO1983* | SSO1101  | flgJ | flagellar biosynthesis                                                            |
| b1082  | SDY2069* | SF1086* | SBO1982  | SSO1102  | flgK | flagellar biosynthesis, hook-filament junction protein 1                          |
| b1083  | SDY2068  | SF1087* | SBO1981  | SSO1103  | flgL | flagellar biosynthesis; hook-filament junction protein                            |
| b1102  | SDY2048  | SF1106* | SBO1961  | SSO1122  | fhuE | outer membrane receptor for ferric iron uptake                                    |
| b1184  | SDY1221  | SF1173  | SBO1888* | SSO1175* | umuC | SOS mutagenesis and repair                                                        |
| b1190  | SDY1227* | SF1179  | SBO1882* | SSO1182  | dadX | alanine racemase 2, catabolic                                                     |
| b1214  | SDY1263  | SF1217  | SBO1853  | SSO1964* | ycaA | orf, hypothetical protein                                                         |
| b1220  | SDY1274* | SF1223  | SBO1846  | SSO1957  | ycaP | putative factor                                                                   |
| b1269  | SDY1339  | SF1271* | SBO1797  | SSO1874  | ycaL | orf, hypothetical protein                                                         |

| MG1655  | Sd197    | SF301   | Sb227    | Ss046    | Gene | Product                                                                     |
|---------|----------|---------|----------|----------|------|-----------------------------------------------------------------------------|
| b1276   | SDY1350* | SF1280  | SBO1788* | SSO1864  | acnA | aconitate hydratase 1                                                       |
| b1285   | SDY1363* | SF1290* | SBO1779  | SSO1855* | yciR | orf, hypothetical protein                                                   |
| b1287   | SDY1367  | SF1292  | SBO1775  | SSO1853* | yciW | putative oxidoreductase                                                     |
| b1328   | SDY1408  | SF1842* | SBO1734  | SSO1805  | ycjZ | putative transcriptional regulator LYSR-type                                |
| b1340   | SDY1419  | SF1829* | SBO1721  | SSO1791  | ydaL | orf, hypothetical protein                                                   |
| b1343   | SDY1425* | SF1826  | SBO1718  | SSO1788  | dbpA | ATP-dependent RNA helicase                                                  |
| b1379   | SDY1463* | SF1820* | SBO1687  | SSO1745  | hslJ | heat shock protein hslJ                                                     |
| b1416.m | SDY1765* | SF1796  | SBO1671  | SSO1725  | gapC | Glyceraldehyde-3-phosphate dehydrogenase                                    |
| b1474   | SDY1604* | SF1751  | SBO1583  | SSO1650  | fdnG | formate dehydrogenase-N, nitrate-inducible, alpha subunit                   |
| b1478   | SDY1608  | SF1747  | SBO1579* | SSO1646* | adhP | alcohol dehydrogenase                                                       |
| b1479   | SDY1609* | SF1746  | SBO1578  | SSO1645  | sfcA | NAD-linked malate dehydrogenase (malic enzyme)                              |
| b1524   | SDY1631  | SF1569  | SBO1642* | SSO1604  | yneH | putative glutaminase                                                        |
| b1532   | SDY1595* | SF1562  | SBO1650  | SSO1596  | marB | multiple antibiotic resistance protein                                      |
| b1542   | SDY1583* | SF1553  | SBO1616  | SSO1586  | ydfI | putative oxidoreductase                                                     |
| b1596   | SDY1559  | SF1617* | SBO1540* | SSO1568  | ynfM | putative transport protein                                                  |
| b1615   | SDY1831* | SF1638  | SBO1521  | SSO1545  | uidC | membrane-associated protein                                                 |
| b1616   | SDY1835  | SF1639* | SBO1520  | SSO1544  | uidB | glucuronide permease                                                        |
| b1635   | SDY1858  | SF1660  | SBO1499  | SSO1523* | gst  | glutathionine S-transferase                                                 |
| b1650   | SDY1876  | SF1677  | SBO1485* | SSO1506  | nemA | N-ethylmaleimide reductase                                                  |
| b1692   | SDY1475  | SF1722  | SBO1439* | SSO1462  | ydiB | putative oxidoreductase                                                     |
| b1748   | SDY1528* | SF1478* | SBO1342  | SSO1409  | cstC | acetylornithine delta-aminotransferase                                      |
| b1790   | SDY1688  | SF1434* | SBO1303  | SSO1371  | yeaM | putative ARAC-type regulatory protein                                       |
| b1818   | SDY1964* | SF1410  | SBO1230  | SSO1342  | manY | PTS enzyme IIC, mannose-specific                                            |
| b1838   | SDY1989* | SF1386* | SBO1253  | SSO1321* | pphA | protein phosphatase 1 modulates phosphoproteins, signals protein misfolding |
| b1845   | SDY1131  | SF1856  | SBO1153* | SSO1303  | ptrB | protease II                                                                 |
| b1852   | SDY1138  | SF1862* | SBO1160  | SSO1296  | zwf  | glucose-6-phosphate dehydrogenase                                           |
| b1864   | SDY1151  | SF1874* | SBO1187  | SSO1277  | yebC | orf, hypothetical protein                                                   |
| b1872   | SDY1171  | SF1913  | SBO1130* | SSO1248  | bisZ | biotin sulfoxide reductase 2                                                |
| b1873   | SDY1175* | SF1914  | SBO1127* | SSO1245  | yecK | putative cytochrome C-type protein                                          |
| b1897   | SDY1194* | SF1944  | SBO1108* | SSO1220  | otsB | trehalose-6-phosphate phosphatase, biosynthetic                             |

| MG1655 | Sd197    | SF301   | Sb227    | Ss046    | Gene | Product                                                                              |
|--------|----------|---------|----------|----------|------|--------------------------------------------------------------------------------------|
| b1901  | SDY1120  | SF1947* | SBO1105* | SSO1217  | araF | L-arabinose-binding periplasmic protein                                              |
| b1916  | SDY1101* | SF1959  | SBO1090  | SSO1202  | sdiA | transcriptional regulator of ftsQAZ gene cluster                                     |
| b1921  | SDY1096  | SF1964  | SBO1085  | SSO1195* | fliZ | orf, hypothetical protein                                                            |
| b1922  | SDY1095  | SF1965* | SBO1084  | SSO1194  | fliA | flagellar biosynthesis; alternative sigma factor 28; regulation of flagellar operons |
| b1926  | SDY1089* | SF1969  | SBO1080* | SSO1982  | fliT | flagellar biosynthesis; repressor of class 3a and 3b operons (RflA activity)         |
| b1931  | SDY1084  | SF1974* | SBO1075  | SSO1987  | yedK | orf, hypothetical protein                                                            |
| b1959  | SDY1047  | SF2003  | SBO1049  | SSO2016* | yedA | putative transmembrane subunit                                                       |
| b1990  | SDY2243  | SF2058  | SBO1213  | SSO2051* | erfK | orf, hypothetical protein                                                            |
| b1993  | SDY2240  | SF2061  | SBO1210* | SSO2054  | cobU | cobinamide kinase/cobinamide phosphate guanylyltransferase                           |
| b2067  | SDY2195* | SF2131* | SBO0894* | SSO2120  | yegE | putative sensor-type protein                                                         |
| b2069  | SDY2193  | SF2134* | SBO0896  | SSO2122  | yegD | putative heat shock protein                                                          |
| b2092  | SDY2264* | SF2154  | SBO0913  | SSO2139  | gatC | PTS system galactitol-specific enzyme IIC                                            |
| b2094  | SDY2266* | SF2156  | SBO0915  | SSO2142* | gatA | galactitol-specific enzyme IIA of phosphotransferase system                          |
| b2095  | SDY2268* | SF2157  | SBO0916* | SSO2143* | gatZ | putative tagatose 6-phosphate kinase 1                                               |
| b2101  | SDY2274  | SF2163* | SBO0922  | SSO2149  | yegW | putative transcriptional regulator                                                   |
| b2127  | SDY2162  | SF2210* | SBO1017  | SSO2183  | yehV | putative transcriptional regulator                                                   |
| b2129  | SDY2159* | SF2214  | SBO1015  | SSO2186  | yehX | putative ATP-binding component of a transport system                                 |
| b2130  | SDY2158* | SF2215  | SBO1014  | SSO2187  | yehY | putative transport system permease protein                                           |
| b2137  | SDY2151  | SF2222* | SBO1007  | SSO2194  | yohF | putative oxidoreductase                                                              |
| b2138  | SDY2150  | SF2223  | SBO1002* | SSO2195  | yohG | putative channel/filament proteins                                                   |
| b2140  | SDY2147  | SF2225  | SBO1001* | SSO2196  | yohI | putative regulator protein                                                           |
| b2147  | SDY2139* | SF2232* | SBO2180* | SSO2203  | yeiA | putative oxidoreductase                                                              |
| b2149  | SDY2133* | SF2234  | SBO2178  | SSO2205  | mgIA | ATP-binding component of methyl-galactoside transport and galactose taxis            |
| b2154  | SDY2112  | SF2239* | SBO2173  | SSO2210  | yeiG | putative esterase (EC 3.1.1.-).                                                      |
| b2182  | SDY0897  | SF2269  | SBO2142* | SSO2238* | bcr  | bicyclomycin resistance protein; transmembrane protein                               |
| b2209  | SDY0869* | SF2293  | SBO2098  | SSO2267  | eco  | ecotin, a serine protease inhibitor                                                  |
| b2210  | SDY0866  | SF2294* | SBO2097  | SSO2268  | yojH | orf, hypothetical protein                                                            |
| b2237  | SDY2431  | SF2319  | SBO2057* | SSO2296  | inaA | pH-inducible protein involved in stress response                                     |
| b2293  | SDY2489  | SF2369  | SBO2328  | SSO2350* | yfbT | putative phosphatase                                                                 |
| b2327  | SDY2526* | SF2403  | SBO2364  | SSO2385  | yfcA | putative structural protein                                                          |

| MG1655 | Sd197    | SF301   | Sb227    | Ss046    | Gene | Product                                                                               |
|--------|----------|---------|----------|----------|------|---------------------------------------------------------------------------------------|
| b2336  | SDY2535  | SF2412* | SBO2375  | SSO2393  | yfcS | putative chaperone                                                                    |
| b2409  | SDY2605* | SF2464  | SBO2432  | SSO2497  | yfeR | putative transcriptional regulator LYSR-type                                          |
| b2418  | SDY2615  | SF2473  | SBO2444* | SSO2508  | pdxK | pyridoxal/pyridoxine/pyridoxamine kinase                                              |
| b2423m | SDY2619  | SF2477* | SBO2448  | SSO2512  | cysW | ABC-type sulfate transport system, permease component                                 |
| b2437  | SDY2635  | SF2490* | SBO2462  | SSO2526  | yfeG | putative ARAC-type regulatory protein                                                 |
| b2464  | SDY2646* | SF2506  | SBO2479* | SSO2544  | talA | transaldolase A                                                                       |
| b2465  | SDY2647* | SF2507  | SBO2480* | SSO2545  | tktB | transketolase 2 isozyme                                                               |
| b2469  | SDY2653  | SF2511* | SBO2485  | SSO2549  | narQ | sensor for nitrate reductase system, protein histidine kinase (acts on NarP and narL) |
| b2470  | SDY2654  | SF2512  | SBO2486* | SSO2550  | acrD | sensitivity to acriflavine, integral membrane protein, possible efflux pump           |
| b2519  | SDY2715* | SF2565  | SBO2543  | SSO2601  | pbpC | putative peptidoglycan enzyme                                                         |
| b2549  | SDY2738  | SF2596  | SBO2577  | SSO2632* | yphG | orf, hypothetical protein                                                             |
| b2550  | SDY2740  | SF2597  | SBO2578  | SSO2633* | yphH | putative NAGC-like transcriptional regulator                                          |
| b2574  | SDY2815  | SF2636* | SBO2602* | SSO2698* | nadB | quinolinate synthetase, B protein                                                     |
| b2604  | SDY2778  | SF2664* | SBO2740  | SSO2761  | yfiN | orf, hypothetical protein                                                             |
| b2662  | SDY2852* | SF2689  | SBO2857* | SSO2806  | gabT | 4-aminobutyrate aminotransferase activity                                             |
| b2674  | SDY2867  | SF2702  | SBO2843  | SSO2819* | nrdI | orf, hypothetical protein                                                             |
| b2679  | SDY2875* | SF2707  | SBO2837  | SSO2824  | proX | high-affinity transport system for glycine betaine and proline                        |
| b2685  | SDY2880  | SF2712* | SBO2832  | SSO2829  | emrA | multidrug resistance secretion protein                                                |
| b2686  | SDY2881* | SF2713  | SBO2831  | SSO2830  | emrB | multidrug resistance; probably membrane translocase                                   |
| b2702  | SDY2898  | SF2725* | SBO2816  | SSO2846  | srlA | PTS system, glucitol/sorbitol-specific IIC component, one of two                      |
| b2703  | SDY2899* | SF2726  | SBO2815  | SSO2847  | srlE | PTS system, glucitol/sorbitol-specific IIB component and second of two IIC components |
| b2705  | SDY2902  | SF2728  | SBO2813  | SSO2849* | srlD | glucitol (sorbitol)-6-phosphate dehydrogenase                                         |
| b2706  | SDY2903  | SF2729  | SBO2812* | SSO2850  | gutM | glucitol operon activator                                                             |
| b2713  | SDY2910* | SF2736  | SBO2805  | SSO2857  | hydN | involved in electron transport from formate to hydrogen, Fe-S centers                 |
| b2723  | SDY2920* | SF2740  | SBO2795  | SSO2870  | hycC | membrane-spanning protein of hydrogenase 3 (part of FHL complex)                      |
| b2731  | SDY2928* | SF2748  | SBO2789  | SSO2878* | fh1A | formate hydrogen-lyase transcriptional activator for fdhF, hyc and hyp operons        |
| b2768  | SDY2970  | SF2784* | SBO2652  | SSO2921  | ygcP | putative anti-terminator regulatory protein                                           |
| b2769  | SDY2971* | SF2785  | SBO2653  | SSO2922  | ygcQ | putative flavoprotein                                                                 |
| b2770  | SDY2972* | SF2786  | SBO2654  | SSO2923  | ygcR | putative transport protein                                                            |

| MG1655 | Sd197    | SF301   | Sb227    | Ss046    | Gene  | Product                                                          |
|--------|----------|---------|----------|----------|-------|------------------------------------------------------------------|
| b2787  | SDY3004* | SF2800  | SBO2668  | SSO2944  | ygcX  | putative glucarate dehydratase                                   |
| b2788  | SDY3005* | SF2801  | SBO2669  | SSO2945  | ygcY  | putative glucarate dehydratase                                   |
| b2799  | SDY3016  | SF2813  | SBO2680* | SSO2956  | fucO  | L-1,2-propanediol oxidoreductase                                 |
| b2801  | SDY3018* | SF2815  | SBO2684* | SSO2958  | fucP  | fucose permease                                                  |
| b2802  | SDY3020  | SF2816  | SBO2685  | SSO2959* | fucI  | L-fucose isomerase                                               |
| b2803  | SDY3021  | SF2817* | SBO2686* | SSO2960  | fucK  | L-fuculokinase                                                   |
| b2825  | SDY3042  | SF2835  | SBO2717* | SSO2982  | ppdB  | prepilin peptidase dependent protein B                           |
| b2826  | SDY3043  | SF2836* | SBO2718  | SSO2983  | ppdA  | prepilin peptidase dependent protein A                           |
| b2841  | SDY3058  | SF2851  | SBO2733* | SSO3001  | araE  | low-affinity L-arabinose transport system proton symport protein |
| b2891  | SDY3191  | SF2877* | SBO3101  | SSO3044* | prfB  | peptide chain release factor RF-2                                |
| b2900  | SDY3181  | SF2886* | SBO3092  | SSO3053  | yqfB  | orf, hypothetical protein                                        |
| b2901  | SDY3180* | SF2887  | SBO3091  | SSO3054  | bgIA  | 6-phospho-beta-glucosidase A; cryptic                            |
| b2956  | SDY3116  | SF2953  | SBO3034  | SSO3240* | yggM  | putative alpha helix chain                                       |
| b2965  | SDY3107  | SF2962  | SBO3024* | SSO3230  | speC  | ornithine decarboxylase isozyme                                  |
| b2966  | SDY3106* | SF2963  | SBO3023  | SSO3229  | yqgA  | putative transport protein                                       |
| b2999m | SDY3074* | SF3045  | SBO2994* | SSO3144  | yghYX | Predicted hydrolase                                              |
| b3015m | SDY3221* | SF3060  | SBO2878  | SSO3158  | ygiRQ | Fe-S oxidoreductase                                              |
| b3039  | SDY3201* | SF3079  | SBO2897  | SSO3176  | ygiD  | orf, hypothetical protein                                        |
| b3057  | SDY3240* | SF3098  | SBO2913  | SSO3194  | bacA  | bacitracin resistance; possibly phosphorylates undecaprenol      |
| b3060  | SDY3243* | SF3101  | SBO2916* | SSO3197* | ygiP  | putative transcriptional regulator LYSR-type                     |
| b3061  | SDY3245* | SF3102  | SBO2919  | SSO3198  | ttdA  | L-tartrate dehydratase, subunit A                                |
| b3062  | SDY3246* | SF3103  | SBO2920  | SSO3199  | ttdB  | L-tartrate dehydratase, subunit B                                |
| b3068  | SDY3252  | SF3110* | SBO2927  | SSO3206  | ygjF  | orf, hypothetical protein                                        |
| b3070  | SDY3254  | SF3111* | SBO2929  | SSO3208  | yqjH  | orf, hypothetical protein                                        |
| b3072  | SDY3256  | SF3113* | SBO2931  | SSO3210  | aer   | aerotaxis sensor receptor, flavoprotein                          |
| b3073  | SDY3257* | SF3114  | SBO2932  | SSO3211  | ygjG  | probable ornithine aminotransferase                              |
| b3076  | SDY3260* | SF3116  | SBO2935  | SSO3215  | ebgA  | evolved beta-D-galactosidase, alpha subunit; cryptic gene        |
| b3079  | SDY3262* | SF3119* | SBO2940  | SSO3126  | ygjJ  | orf, hypothetical protein                                        |
| b3080  | SDY3263  | SF3120  | SBO2941* | SSO3125  | ygjK  | putative isomerase                                               |
| b3086  | SDY3271* | SF3126  | SBO2947  | SSO3119  | ygjQ  | orf, hypothetical protein                                        |

| MG1655 | Sd197    | SF301   | Sb227    | Ss046    | Gene | Product                                                             |
|--------|----------|---------|----------|----------|------|---------------------------------------------------------------------|
| b3091  | SDY3276  | SF3131  | SBO2952* | SSO3244  | uxaA | altronate hydrolase                                                 |
| b3092  | SDY3277* | SF3132  | SBO2953  | SSO3245  | uxaC | uronate isomerase                                                   |
| b3093  | SDY3278  | SF3133  | SBO2954  | SSO3246* | exuT | transport of hexuronates                                            |
| b3097  | SDY3284  | SF3140* | SBO2964  | SSO3256  | yqjC | orf, hypothetical protein                                           |
| b3105  | SDY3297  | SF3147  | SBO2972  | SSO3264* | yhaJ | putative transcriptional regulator LYSR-type                        |
| b3110  | SDY3301  | SF3151  | SBO2976* | SSO3268  | yhaO | putative transport system permease protein                          |
| b3113  | SDY3305* | SF3153  | SBO2978  | SSO3270  | yhaR | orf, hypothetical protein                                           |
| b3126  | SDY3320  | SF3163* | SBO2991  | SSO3281  | yhaF | orf, hypothetical protein                                           |
| b3127  | SDY3321* | SF3164  | SBO2992* | SSO3282  | yhaU | putative transport protein                                          |
| b3151  | SDY3330* | SF3192  | SBO3231  | SSO3297  | yraQ | orf, hypothetical protein                                           |
| b3173  | SDY3352  | SF3214* | SBO3209  | SSO3321  | yhbX | putative alkaline phosphatase I                                     |
| b3203  | SDY3384  | SF3243  | SBO3179* | SSO3351  | yhbH | probable sigma-54 modulation protein                                |
| b3208  | SDY3389  | SF3248* | SBO3174  | SSO3356  | mtgA | putative peptidoglycan enzyme                                       |
| b3241  | SDY3417  | SF3281  | SBO3148* | SSO3383  | yhcQ | putative membrane protein                                           |
| b3243  | SDY3419  | SF3282  | SBO3144  | SSO3385* | qseA | quorum sensing Escherichia coli regulator A                         |
| b3262  | SDY3439* | SF3300  | SBO3256  | SSO3403  | yhdJ | putative methyltransferase                                          |
| b3271  | SDY3448* | SF3310  | SBO3265  | SSO3412  | yhdZ | putative ATP-binding component of a transport system                |
| b3283  | SDY3460  | SF3315  | SBO3277  | SSO3424* | yrdD | putative DNA topoisomerase                                          |
| b3355  | SDY3517* | SF3374  | SBO3335  | SSO3486  | prkB | probable phosphoribulokinase                                        |
| b3391  | SDY3688* | SF3409  | SBO3378  | SSO3522  | hofQ | putative transport portein                                          |
| b3392  | SDY3687  | SF3410* | SBO3379  | SSO3523  | yrfA | orf, hypothetical protein                                           |
| b3394  | SDY3685  | SF3412  | SBO3381  | SSO3525* | yrfC | orf, hypothetical protein                                           |
| b3402  | SDY3674  | SF3420  | SBO3389  | SSO3533* | yhgE | putative transport                                                  |
| b3411  | SDY3665  | SF3430  | SBO3400  | SSO3542* | yhgA | orf, hypothetical protein                                           |
| b3413  | SDY3664* | SF3436  | SBO3401  | SSO3544  | yhgH | orf, hypothetical protein                                           |
| b3418  | SDY3658  | SF3441* | SBO3407  | SSO3550  | malT | positive regulator of mal regulon                                   |
| b3441  | SDY3592* | SF3463  | SBO3438  | SSO3683  | yhhY | orf, hypothetical protein                                           |
| b3449  | SDY3597* | SF3466  | SBO3445  | SSO3687  | ugpQ | glycerophosphodiester phosphodiesterase, cytosolic                  |
| b3450  | SDY3598* | SF3468* | SBO3446  | SSO3688  | ugpC | ATP-binding component of sn-glycerol 3-phosphate transport system   |
| b3451  | SDY3599  | SF3469  | SBO3447* | SSO3689  | ugpE | sn-glycerol 3-phosphate transport system, integral membrane protein |



| MG1655 | Sd197    | SF301   | Sb227    | Ss046    | Gene | Product                                                              |
|--------|----------|---------|----------|----------|------|----------------------------------------------------------------------|
| b3468  | SDY3619* | SF3486  | SBO3465  | SSO3706  | yhhN | putative enzyme                                                      |
| b3474  | SDY3625* | SF3492  | SBO3471  | SSO3712  | yhhT | orf, hypothetical protein                                            |
| b3496  | SDY3566  | SF3527* | SBO3494  | SSO3731  | yhiP | putative transport protein                                           |
| b3508  | SDY3545* | SF3542* | SBO3507* | SSO3578  | yhiD | putative transport ATPase                                            |
| b3513  | SDY3538  | SF3599* | SBO3512  | SSO3573  | yhiU | putative membrane protein                                            |
| b3515  | SDY3534* | SF3596  | SBO3514  | SSO3571  | yhiW | putative ARAC-type regulatory protein                                |
| b3526  | SDY4546* | SF3557  | SBO3525  | SSO3865  | kdgK | ketodeoxygluconokinase                                               |
| b3530  | SDY4550* | SF3562* | SBO3529  | SSO3861* | yhjL | putative oxidoreductase subunit                                      |
| b3533  | SDY4553  | SF3564* | SBO3532  | SSO3858* | yhjO | putative cellulose synthase                                          |
| b3534  | SDY4554* | SF3565  | SBO3533  | SSO3857  | yhjQ | orf, hypothetical protein                                            |
| b3538  | SDY4561* | SF3570  | SBO3537  | SSO3852  | yhjU | orf, hypothetical protein                                            |
| b3544  | SDY4567  | SF3579  | SBO3543* | SSO3846  | dppA | dipeptide transport protein                                          |
| b3548  | SDY4354* | SF3583  | SBO3550  | SSO3842  | yhjY | putative lipase                                                      |
| b3552  | SDY4351* | SF3586  | SBO3554  | SSO3836  | viaD | putative outer membrane protein                                      |
| b3638  | SDY4068  | SF3677  | SBO3640  | SSO3768* | radC | DNA repair protein                                                   |
| b3647  | SDY4078* | SF3686  | SBO3730* | SSO3759  | yicF | putative enzyme                                                      |
| b3656  | SDY4088* | SF3696  | SBO3721  | SSO3748* | yicI | orf, hypothetical protein                                            |
| b3657  | SDY4578* | SF3697* | SBO3720  | SSO3746  | yicJ | putative permease                                                    |
| b3711  | SDY4202  | SF3751* | SBO3664  | SSO3555  | yidZ | putative transcriptional regulator LYSR-type                         |
| b3713  | SDY4200* | SF3747  | SBO3662  | SSO3557* | yieF | orf, hypothetical protein                                            |
| b3738  | SDY4010  | SF3818  | SBO3749* | SSO3881  | atpB | membrane-bound ATP synthase, F0 sector, subunit a                    |
| b3748  | SDY4000* | SF3829  | SBO3762  | SSO3918  | rbsD | D-ribose high-affinity transport system; membrane-associated protein |
| b3749  | SDY3999* | SF3830* | SBO3763* | SSO3919  | rbsA | ATP-binding component of D-ribose high-affinity transport system     |
| b3751  | SDY3996* | SF3834* | SBO3765* | SSO3921* | rbsB | D-ribose periplasmic binding protein                                 |
| b3765  | SDY3982* | SF3841* | SBO3777  | SSO3937* | yifB | putative 2-component regulator                                       |
| b3788  | SDY3960* | SF3862  | SBO3799  | SSO3960  | rffG | dTDP-glucose 4,6-dehydratase                                         |
| b3800  | SDY3947* | SF3871  | SBO3812  | SSO3973  | aslB | putative arylsulfatase regulator                                     |
| b3815m | SDY3930  | SF3893* | SBO3828* | SSO3990* | yigE | Predicted periplasmic protein                                        |
| b3840m | SDY3904* | SF3917  | SBO3853  | SSO4014  | tatD | Mg-dependent DNase                                                   |

| MG1655 | Sd197    | SF301   | Sb227    | Ss046    | Gene | Product                                                                                                                                                 |
|--------|----------|---------|----------|----------|------|---------------------------------------------------------------------------------------------------------------------------------------------------------|
| b3846  | SDY3899  | SF3922  | SBO3858* | SSO4019  | fadB | 4-enzyme protein: 3-hydroxyacyl-CoA dehydrogenase; 3-hydroxybutyryl-CoA epimerase; delta(3)-cis-delta(2)-trans-enoyl-CoA isomerase; enoyl-CoA hydratase |
| b3861  | SDY3882* | SF3932  | SBO3873* | SSO4034* | yihF | putative GTP-binding protein                                                                                                                            |
| b3903  | SDY3843* | SF3980  | SBO3921  | SSO4073  | rhaA | L-rhamnose isomerase                                                                                                                                    |
| b3906  | SDY3840  | SF3983  | SBO3924  | SSO4076* | rhaR | positive regulator for rhaRS operon                                                                                                                     |
| b3918  | SDY3829* | SF3996  | SBO3935  | SSO4087  | cdh  | CDP-diacylglycerol phosphotidylhydrolase                                                                                                                |
| b3921  | SDY3824  | SF3999* | SBO3938  | SSO4090  | yiiR | orf, hypothetical protein                                                                                                                               |
| b3942  | SDY3777* | SF4020  | SBO3962  | SSO4116  | katG | catalase; hydroperoxidase HPI(I)                                                                                                                        |
| b3944  | SDY3779  | SF4022* | SBO3964  | SSO4118  | yijF | orf, hypothetical protein                                                                                                                               |
| b3945  | SDY3780  | SF4023* | SBO3965  | SSO4119  | gldA | glycerol dehydrogenase, (NAD)                                                                                                                           |
| b3947  | SDY3782  | SF4025* | SBO3967  | SSO4121  | ptsA | PEP-protein phosphotransferase system enzyme I                                                                                                          |
| b3950  | SDY3785  | SF4027  | SBO3969  | SSO4123* | frwB | PTS system fructose-like IIB component 1                                                                                                                |
| b3951  | SDY3786  | SF4028  | SBO3970  | SSO4124* | pflD | formate acetyltransferase 2                                                                                                                             |
| b3966  | SDY3762  | SF4048  | SBO3985* | SSO4139  | btuB | outer membrane receptor for transport of vitamin B12, E colicins, and bacteriophage BF23                                                                |
| b3992  | SDY3734  | SF4064  | SBO4013* | SSO4165  | thiF | thiamin biosynthesis, thiazole moiety                                                                                                                   |
| b4013  | SDY4330  | SF4079* | SBO4033  | SSO4185  | metA | homoserine transsuccinylase                                                                                                                             |
| b4014  | SDY4329* | SF4080* | SBO4034  | SSO4186  | aceB | malate synthase A                                                                                                                                       |
| b4015  | SDY4328  | SF4081  | SBO4035* | SSO4187  | aceA | isocitrate lyase                                                                                                                                        |
| b4021  | SDY4318* | SF4087  | SBO4042  | SSO4192  | pepE | peptidase E, a dipeptidase where amino-terminal residue is aspartate                                                                                    |
| b4029  | SDY4219* | SF4176  | SBO4057  | SSO4207  | yjbH | orf, hypothetical protein                                                                                                                               |
| b4055  | SDY4514* | SF4149  | SBO4084  | SSO4235  | aphA | diadenosine tetraphosphatase                                                                                                                            |
| b4107  | SDY4110* | SF4116  | SBO4132  | SSO4282* | phnB | orf, hypothetical protein                                                                                                                               |
| b4109  | SDY4106* | SF4114  | SBO4136* | SSO4284  | yjdB | putative vimentin                                                                                                                                       |
| b4110  | SDY4103  | SF4113  | SBO4137* | SSO4285  | yjcz | orf, hypothetical protein                                                                                                                               |
| b4113  | SDY4100* | SF4110  | SBO4140  | SSO4288  | basR | transcriptional regulatory protein, member of 2-component regulatory system,                                                                            |
| b4118  | SDY4093* | SF4105  | SBO4145  | SSO4293  | melR | regulator of melibiose operon                                                                                                                           |
| b4121  | SDY4230* | SF4102  | SBO4325  | SSO4298  | yjdB | orf, hypothetical protein                                                                                                                               |
| b4148  | SDY4392  | SF4306  | SBO4308  | SSO4334* | sugE | suppresses groEL, may be chaperone                                                                                                                      |
| b4167  | SDY4426* | SF4321  | SBO4290  | SSO4351  | yjeF | orf, hypothetical protein                                                                                                                               |

| MG1655 | Sd197    | SF301   | Sb227    | Ss046    | Gene | Product                                                                          |
|--------|----------|---------|----------|----------|------|----------------------------------------------------------------------------------|
| b4185  | SDY4402  | SF4338  | SBO4270  | SSO4367* | yjfM | orf, hypothetical protein                                                        |
| b4193  | SDY4362  | SF4348  | SBO4262  | SSO4375* | sgaT | orf, hypothetical protein                                                        |
| b4197  | SDY4366* | SF4352  | SBO4258  | SSO4379  | sgaU | putative hexulose-6-phosphate isomerase                                          |
| b4198  | SDY4367  | SF4353  | SBO4257* | SSO4380  | sgaE | putative epimerase/aldolase                                                      |
| b4207  | SDY4377  | SF4279  | SBO4238* | SSO4392* | fkfB | FKBP-type 22KD peptidyl-prolyl cis-trans isomerase (rotamase)                    |
| b4227  | SDY4463* | SF4263  | SBO4218  | SSO4409  | ytfQ | putative LACI-type transcriptional regulator                                     |
| b4228  | SDY4247  | SF4262  | SBO4217* | SSO4410  | ytfR | putative ATP-binding component of a transport system                             |
| b4252  | SDY4270  | SF4239  | SBO4195  | SSO4432* | yjgK | orf, hypothetical protein                                                        |
| b4355  | SDY4608* | SF4386  | SBO4414  | SSO4501* | tsr  | methyl-accepting chemotaxis protein I, serine sensor receptor                    |
| b4364  | SDY4620* | SF4395  | SBO4424  | SSO4510  | yjjP | putative structural protein                                                      |
| b4366  | SDY4624* | SF4399  | SBO4426* | SSO4513  | bglJ | 2-component transcriptional regulator                                            |
| b4376  | SDY4636  | SF4407  | SBO4437* | SSO4526  | osmY | hyperosmotically inducible periplasmic protein                                   |
| b4386  | SDY4647  | SF4418* | SBO4449  | SSO4536  | lplA | lipoate-protein ligase A                                                         |
| b4394  | SDY4655  | SF4426* | SBO4457  | SSO4544  | yjjX | orf, hypothetical protein                                                        |
| b4399  | SDY4660* | SF4431  | SBO4462  | SSO4549  | creC | catabolite repression sensor kinase for PhoB; alternative sensor for pho regulon |
| b4400  | SDY4661* | SF4432  | SBO4463  | SSO4550  | creD | tolerance to colicin E2                                                          |
