# Supplementary material
Source: PubMed Central journal article supplement (PMC1278947)
Supplement: nar_33_19_6445__3.pdf [file nar_33_19_6445__3.pdf]

**Table S2.** Inactive genes or operons due to deletions or pseudogenes in the *Shigella* genomes

| Gene              | Product                                                                   | Sd197    | Sf301   | Sb227    | Ss046    |
|-------------------|---------------------------------------------------------------------------|----------|---------|----------|----------|
| <b>Metabolism</b> |                                                                           |          |         |          |          |
| <i>speF</i>       | ornithine decarboxylase isozyme, inducible                                | -        | SF0603* | SBO0554  | SSO0644  |
| <i>speC</i>       | ornithine decarboxylase isozyme                                           | SDY3107  | SF2962  | SBO3024* | SSO3230  |
| <i>lacY</i>       | galactoside permease                                                      | SDY0376* | -       | -        | SSO0300* |
| <i>lacZ</i>       | beta-D-galactosidase                                                      | SDY0378  | -       | -        | SSO0299  |
| <i>lacI</i>       | transcriptional repressor of the lac operon                               | SDY0379  | -       | -        | SSO0298  |
| <i>lyxK</i>       | L-xylulose kinase, cryptic                                                | -        | -       | -        | -        |
| <i>mhpR</i>       | transcriptional regulator for mhp operon                                  | -        | -       | -        | SSO0296* |
| <i>mhpA</i>       | 3-(3-hydroxyphenyl)propionate hydroxylase                                 | -        | -       | -        | SSO0297  |
| <i>mhpB</i>       | 2,3-dihydroxyphenylpropionate 1,2-dioxygenase                             | -        | -       | -        | SSO0295  |
| <i>mhpC</i>       | 2-hydroxy-6-keonona-2,4-dienedioic acid hydrolase                         | -        | -       | -        | SSO0328* |
| <i>mhpD</i>       | 2-keto-4-pentenoate hydratase                                             | -        | -       | -        | SSO0329  |
| <i>mhpF</i>       | acetaldehyde dehydrogenase                                                | -        | -       | -        | SSO0330  |
| <i>mhpE</i>       | 4-hydroxy-2-ketovalerate aldolase                                         | -        | -       | -        | SSO0331  |
| <i>srlA</i>       | PTS system, glucitol/sorbitol-specific II, C component                    | SDY2898  | SF2725* | SBO2816  | SSO2846  |
| <i>srlE</i>       | PTS system, glucitol/sorbitol-specific II, B component                    | SDY2899* | SF2726  | SBO2815  | SSO2847  |
| <i>srlD</i>       | glucitol (sorbitol)-6-phosphate dehydrogenase                             | SDY2902  | SF2728  | SBO2813  | SSO2849* |
| <i>xylA</i>       | D-xylose isomerase                                                        | -        | SF3609* | SBO3573  | SSO3820  |
| <i>xylB</i>       | xylulokinase                                                              | -        | SF3608  | SBO3572  | SSO3821  |
| <i>xylE</i>       | xylose-proton symport                                                     | SDY4217* | SF4174  | SBO4060* | SSO4209  |
| <i>xylF</i>       | xylose binding protein transport system                                   | SDY4336* | SF3610  | SBO3574  | -        |
| <i>xylG</i>       | D-xylose transport system ATP-binding protein                             | -        | SF3611  | SBO3575  | -        |
| <i>xylH</i>       | D-xylose transport system permease protein                                | -        | SF3612  | SBO3576  | -        |
| <i>xylR</i>       | putative regulator of xyl operon                                          | SDY3710  | SF3613* | SBO3577  | -        |
| <i>hcaD</i>       | ferredoxin reductase subunit of phenylpropionate dioxygenase              | -        | SF2589* | SBO2566* | SSO2624  |
| <i>glcF</i>       | glycolate oxidase iron-sulfur subunit                                     | -        | SF3017* | -        | -        |
| <i>glcD</i>       | glycolate oxidase subunit D                                               | -        | SF3018* | -        | -        |
| <i>dgoA</i>       | 2-oxo-3-deoxygalactonate 6-phosphate aldolase and galactonate dehydratase | -        | SF3771* | -        | SSO3643* |
| <i>bglB</i>       | phospho-beta-glucosidase B; cryptic                                       | -        | SF3734* | -        | SSO3913* |

| Gene        | Product                                                                  | Sd197    | Sf301   | Sb227    | Ss046    |
|-------------|--------------------------------------------------------------------------|----------|---------|----------|----------|
| <i>mtlA</i> | PTS system, mannitol-specific enzyme IIABC components                    | -        | SF3633  | SBO3597  | SSO3809  |
| <i>mtlD</i> | mannitol-1-phosphate dehydrogenase                                       | -        | SF3634  | SBO3598  | SSO3808  |
| <i>cmtA</i> | PTS system, mannitol-specific enzyme II component, cryptic               | SDY3144  | -       | SBO3056  | SSO3087* |
| <i>cmtB</i> | PTS system, mannitol-specific enzyme II component, cryptic               | SDY3143  | -       | SBO3055  | SSO3088  |
| <i>cpsG</i> | phosphomannomutase                                                       | -        | SF2111  | SBO0875  | SSO2101  |
| <i>cpsB</i> | mannose-1-phosphate guanyltransferase                                    | -        | SF2112  | SBO0876  | SSO2102  |
| <i>tnaA</i> | tryptophanase                                                            | -        | SF3754  | SBO3667* | -        |
| <i>cadA</i> | lysine decarboxylase 1                                                   | SDY4466* | -       | -        | SSO4308* |
| <i>cadB</i> | transport of lysine/cadaverine                                           | SDY4465* | SF4286  | -        | SSO4315* |
| <i>cadC</i> | transcriptional activator of cad operon                                  | -        | -       | -        | SSO4316* |
| <i>ybbX</i> | putative hydrolase                                                       | -        | -       | -        | SSO0502* |
| <i>ybbY</i> | putative transport                                                       | -        | -       | -        | SSO0501* |
| <i>wcaL</i> | putative colanic acid biosynthesis glycosyl transferase                  | -        | SF2107  | SBO0871  | -        |
| <i>wcaK</i> | putative galactokinase (EC 2.7.1.6).                                     | -        | SF2108  | SBO0872  | -        |
| <i>wcaJ</i> | putative colanic acid biosynthesis UDP-glucose lipid carrier transferase | -        | SF2110  | SBO0874  | -        |
| <i>wcaI</i> | putative colanic biosynthesis glycosyl transferase                       | -        | SF2113  | SBO0877* | SSO2103  |
| <i>wcaH</i> | GDP-mannose mannosyl hydrolase                                           | -        | SF2114  | SBO0878  | SSO2104  |
| <i>wcaF</i> | putative transferase                                                     | -        | SF2117  | SBO0881  | SSO2107  |
| <i>wcaE</i> | putative colanic acid biosynthesis glycosyl transferase                  | -        | -       | SBO0882  | SSO2108  |
| <i>wcaD</i> | putative colanic acid polymerase                                         | -        | SF2120* | SBO0883  | SSO2109  |
| <i>wcaC</i> | putative glycosyl transferase                                            | -        | SF2121  | SBO0884  | SSO2110  |
| <i>wcaB</i> | putative transferase                                                     | -        | SF2122  | SBO0885  | SSO2111  |
| <i>wcaA</i> | putative regulator                                                       | -        | SF2123* | SBO0886  | SSO2112  |
| <i>wcaG</i> | putative nucleotide di-P-sugar epimerase or dehydratase                  | -        | SF2115  | SBO0879  | SSO2105  |
| <i>phnP</i> | phosphonate metabolism                                                   | SDY4124  | -       | SBO4118  | SSO4268  |
| <i>phnO</i> | putative regulator, phn operon                                           | SDY4123  | -       | SBO4119  | SSO4269  |
| <i>phnN</i> | ATP-binding component of phosphonate transport                           | SDY4122  | -       | SBO4120  | SSO4270  |
| <i>phnM</i> | phosphonate metabolism                                                   | SDY4121  | -       | SBO4121  | SSO4271  |
| <i>phnL</i> | ATP-binding component of phosphonate transport                           | SDY4120  | -       | SBO4122  | SSO4272  |
| <i>phnK</i> | ATP-binding component of phosphonate transport                           | SDY4119  | -       | SBO4123  | SSO4273  |

| Gene                                              | Product                                                                              | Sd197    | Sf301   | Sb227    | Ss046    |
|---------------------------------------------------|--------------------------------------------------------------------------------------|----------|---------|----------|----------|
| <i>phnJ</i>                                       | phosphonate metabolism                                                               | SDY4118  | -       | SBO4124  | SSO4274  |
| <i>phnI</i>                                       | phosphonate metabolism                                                               | SDY4117  | -       | SBO4125  | SSO4275  |
| <i>phnH</i>                                       | phosphonate metabolism                                                               | SDY4116  | -       | SBO4126  | SSO4276  |
| <i>phnG</i>                                       | phosphonate metabolism                                                               | SDY4115* | -       | SBO4127  | SSO4277  |
| <b>Regulators</b>                                 |                                                                                      |          |         |          |          |
| <i>atoS</i>                                       | sensor protein AtoS for response regulator AtoC                                      | -        | -       | -        | SSO2278  |
| <i>atoC</i>                                       | response regulator of ato, ornithine decarboxylase antizyme (sensor ATOS)            | -        | -       | -        | SSO2279  |
| <i>torS</i>                                       | sensor protein torS (regulator TorR)                                                 | SDY0967* | SF0995  | SBO2238  | SSO1001  |
| <i>torC</i>                                       | trimethylamine N-oxide reductase, cytochrome c-type subunit                          | SDY0970* | SF0997  | SBO2235  | SSO1004  |
| <i>torA</i>                                       | trimethylamine N-oxide reductase subunit                                             | SDY0971* | SF0999* | SBO2234* | SSO1005* |
| <i>torD</i>                                       | part of trimethylamine-N-oxide oxidoreductase                                        | SDY0972  | SF1000* | SBO2233  | SSO1006* |
| <i>yqeI</i>                                       | putative sensory transducer                                                          | -        | -       | -        | SSO3007* |
| <i>yiaU</i>                                       | putative transcriptional regulator LYSR-type                                         | SDY4539* | -       | -        | -        |
| <b>Outer membrane proteins &amp; Transporters</b> |                                                                                      |          |         |          |          |
| <i>ompG</i>                                       | outer membrane protein                                                               | -        | SF1325* | -        | SSO1820* |
| <i>fhuE</i>                                       | outer membrane receptor for ferric iron uptake                                       | SDY2048  | SF1106* | SBO1961  | SSO1122  |
| <i>fecB</i>                                       | citrate-dependent iron transport, periplasmic protein                                | SDY4296* | -       | -        | SSO4462  |
| <i>fecR</i>                                       | regulator for fec operon, periplasmic                                                | SDY4298* | -       | -        | SSO4464  |
| <i>fecE</i>                                       | ATP-binding component of citrate-dependent iron(III) transport protein               | SDY4293  | -       | -        | SSO4459  |
| <i>fecD</i>                                       | citrate-dependent iron transport, membrane-bound protein                             | SDY4294  | -       | -        | SSO4460  |
| <i>fecC</i>                                       | citrate-dependent iron(III) transport protein, cytosolic                             | SDY4295  | -       | -        | SSO4461  |
| <i>fecA</i>                                       | outer membrane receptor; citrate-dependent iron transport, outer membrane receptor   | SDY4297  | -       | -        | SSO4463  |
| <i>fepE</i>                                       | ferric enterobactin (enterochelin) transport                                         | SDY0518  | SF0501* | SBO0448  | SSO0538  |
| <i>flu</i>                                        | outer membrane fluffing protein, similar to adhesin                                  | SDY4587* | SF2991  | -        | -        |
| <b>Flagellar</b>                                  |                                                                                      |          |         |          |          |
| <i>fliA</i>                                       | flagellar biosynthesis                                                               | -        | SF0278  | -        | SSO0273  |
| <i>flhA</i>                                       | flagellar biosynthesis; possible export of flagellar proteins                        | SDY1184* | SF1923* | SBO1121  | SSO1241* |
| <i>flhB</i>                                       | putative part of export apparatus for flagellar proteins                             | -        | SF1924  | SBO1120  | SSO1240  |
| <i>fliA</i>                                       | flagellar biosynthesis; alternative sigma factor 28; regulation of flagellar operons | SDY1095  | SF1965* | SBO1084  | SSO1194  |
| <i>fliC</i>                                       | flagellar biosynthesis; flagellin, filament structural protein                       | SDY1092* | SF1966  | SBO1083  | SSO1193  |

| Gene            | Product                                                                                                              | Sd197    | Sf301   | Sb227    | Ss046    |
|-----------------|----------------------------------------------------------------------------------------------------------------------|----------|---------|----------|----------|
| <i>fliD</i>     | flagellar biosynthesis; filament capping protein; enables filament assembly                                          | SDY1091  | SF1967  | SBO1082  | SSO1190* |
| <i>fliT</i>     | flagellar biosynthesis; repressor of class 3a and 3b operons (RflA activity)                                         | SDY1089* | SF1969  | SBO1080* | SSO1982  |
| <i>fliF</i>     | flagellar biosynthesis; basal-body MS(membrane and supramembrane)-ring and collar protein                            | -        | SF1983* | SBO1070  | SSO1996  |
| <i>fliE</i>     | flagellar biosynthesis; basal-body component, possibly at (MS-ring)-rod junction                                     | -        | SF1982  | SBO1071  | SSO1995  |
| <i>fliG</i>     | flagellar biosynthesis, component of motor switching and energizing, enabling rotation and determining its direction | -        | SF1984  | SBO1069* | SSO1997  |
| <i>fliH</i>     | flagellar biosynthesis; export of flagellar proteins?                                                                | -        | SF1985  | SBO1068* | SSO1998  |
| <i>fliI</i>     | flagellum-specific ATP synthase                                                                                      | -        | SF1986  | SBO1066* | SSO1999  |
| <i>fliJ</i>     | flagellar fliJ protein                                                                                               | -        | SF1987  | SBO1065  | SSO2000  |
| <i>fliK</i>     | flagellar hook-length control protein                                                                                | -        | SF1988  | SBO1064* | SSO2001  |
| <i>fliO</i>     | flagellar biosynthesis                                                                                               | -        | SF1992  | SBO1060  | SSO2005  |
| <i>fliP</i>     | flagellar biosynthesis                                                                                               | -        | SF1993  | SBO1059* | SSO2006  |
| <i>fliQ</i>     | flagellar biosynthesis                                                                                               | -        | SF1994  | SBO1058  | SSO2007  |
| <i>fliR</i>     | flagellar biosynthesis                                                                                               | -        | SF1995  | SBO1057  | SSO2008  |
| <i>fliM</i>     | flagellar biosynthesis, component of motor switch and energizing, enabling rotation and determining its direction    | -        | SF1990  | SBO1062  | SSO2003  |
| <i>fliN</i>     | flagellar biosynthesis, component of motor switch and energizing, enabling rotation and determining its direction    | -        | SF1991  | SBO1061  | SSO2004  |
| <i>motA</i>     | proton conductor component of motor; no effect on switching                                                          | SDY1189  | SF1939  | -        | SSO1227  |
| <i>yaiU</i>     | flagellar protein; similar to 3rd module of ATP-binding components of transporters                                   | -        | SF0239* | SBO0269  | SSO0349  |
| <i>flgN</i>     | protein of flagellar biosynthesis                                                                                    | SDY2082* | SF1076  | SBO1994  | SSO1090  |
| <i>flgF</i>     | flagellar biosynthesis, cell-proximal portion of basal-body rod                                                      | SDY2074* | SF1081* | SBO1987  | SSO1097  |
| <i>flgG</i>     | flagellar biosynthesis, cell-distal portion of basal-body rod                                                        | SDY2073* | SF1082  | SBO1986  | SSO1098* |
| <i>flgJ</i>     | flagellar biosynthesis                                                                                               | SDY2070  | SF1085  | SBO1983* | SSO1101  |
| <i>flgK</i>     | flagellar biosynthesis, hook-filament junction protein 1                                                             | SDY2069* | SF1086* | SBO1982  | SSO1102  |
| <i>flgL</i>     | flagellar biosynthesis; hook-filament junction protein                                                               | SDY2068  | SF1087* | SBO1981  | SSO1103  |
| <b>Fimbrial</b> |                                                                                                                      |          |         |          |          |
| Z0022           | putative usher protein                                                                                               | -        | -       | -        | -        |
| Z0023           | putative chaperone protein                                                                                           | -        | -       | -        | -        |

| Gene         | Product                                                                                              | Sd197    | Sf301   | Sb227    | Ss046    |
|--------------|------------------------------------------------------------------------------------------------------|----------|---------|----------|----------|
| <i>Z0024</i> | putative type-1 fimbrial protein                                                                     | -        | -       | -        | -        |
| <i>hofC</i>  | putative integral membrane protein involved in biogenesis of fimbriae, protein transport, DNA uptake | SDY0136* | SF0103  | SBO0094  | SSO0114  |
| <i>hofB</i>  | putative integral membrane protein involved in biogenesis of fimbriae, protein transport, DNA uptake | SDY0137  | SF0104* | SBO0095* | SSO0115* |
| <i>yadC</i>  | putative fimbrial protein                                                                            | -        | -       | -        | -        |
| <i>yadK</i>  | putative fimbrial protein                                                                            | -        | -       | -        | SSO0145  |
| <i>yadL</i>  | putative fimbrial protein                                                                            | -        | -       | -        | SSO0146  |
| <i>yadM</i>  | putative fimbrial protein                                                                            | -        | -       | -        | -        |
| <i>htrE</i>  | putative fimbrial usher protein                                                                      | -        | -       | SBO0125* | SSO0151* |
| <i>ecpD</i>  | putative fimbrial chaperone protein                                                                  | -        | -       | SBO0126  | SSO0152  |
| <i>yadN</i>  | putative fimbrial protein                                                                            | -        | -       | SBO0128* | SSO0153  |
| <i>sfmA</i>  | putative fimbrial-like protein                                                                       | -        | SF0461  | -        | -        |
| <i>sfmC</i>  | putative chaperone                                                                                   | SDY0256  | SF0462  | -        | -        |
| <i>sfmD</i>  | putative outer membrane protein, export function                                                     | -        | -       | -        | SSO0505* |
| <i>sfmH</i>  | involved in fimbrial assembly                                                                        | -        | -       | -        | SSO0506  |
| <i>sfmF</i>  | putative fimbrial protein                                                                            | -        | -       | -        | SSO0507  |
| <i>fimZ</i>  | fimbrial Z protein; probable signal transducer                                                       | -        | -       | SBO0429  | SSO0510* |
| <i>ybgO</i>  | orf, hypothetical protein                                                                            | SDY0651  | SF0581* | SBO0575* | SSO0667  |
| <i>ybgP</i>  | putative chaperone                                                                                   | SDY0652  | SF0580  | -        | SSO0668  |
| <i>ybgQ</i>  | putative outer membrane usher protein                                                                | SDY0654* | SF0579  | -        | SSO0669* |
| <i>ybgD</i>  | putative fimbriae structural protein                                                                 | SDY0655  | SF0578  | -        | SSO0670  |
| <i>ycbM</i>  | putative transport system permease protein                                                           | SDY2323  | SF0931  | SBO2225* | SSO0937  |
| <i>ycbQ</i>  | putative fimbrial-like protein                                                                       | -        | -       | SBO2229* | SSO0942  |
| <i>ycbR</i>  | putative chaperone                                                                                   | -        | -       | -        | SSO0943  |
| <i>ycbS</i>  | putative outer membrane protein                                                                      | -        | SF0941  | SBO3652* | SSO0944* |
| <i>Z1290</i> | homolog of <i>Salmonella</i> FimH protein                                                            | SDY0914  | SF0942  | -        | SSO0945  |
| <i>Z1291</i> | putative fimbrial-like protein                                                                       | SDY0915  | SF0943  | -        | SSO0946  |
| <i>Z1292</i> | putative fimbrial-like protein                                                                       | SDY0916  | SF0944  | -        | SSO0947  |
| <i>ycbF</i>  | PapD-like chaperone involved in fimbrial biogenesis                                                  | SDY0917  | SF0945  | SBO2287  | SSO0948  |

| Gene          | Product                                                 | Sd197    | Sf301   | Sb227    | Ss046    |
|---------------|---------------------------------------------------------|----------|---------|----------|----------|
| <i>Z1534</i>  | putative chaperone                                      | -        | -       | -        | -        |
| <i>Z1536</i>  | putative usher protein                                  | -        | -       | -        | -        |
| <i>Z1537</i>  | putative chaperone                                      | -        | -       | -        | -        |
| <i>Z1538</i>  | putative pilin subunit                                  | -        | -       | -        | -        |
| <i>Z2200</i>  | putative major fimbrial subunit                         | -        | -       | -        | -        |
| <i>Z2201</i>  | putative fimbrial chaperone protein                     | -        | -       | -        | -        |
| <i>Z2203</i>  | putative fimbrial usher protein                         | -        | -       | -        | -        |
| <i>Z2204</i>  | putative fimbrial-like protein                          | -        | -       | -        | -        |
| <i>Z2205</i>  | putative fimbrial-like protein                          | -        | -       | -        | -        |
| <i>Z2206</i>  | putative adhesin; similar to FimH protein               | SDY1657  | SF1539  | -        | SSO1621  |
| <i>yehA</i>   | putative type-1 fimbrial protein                        | -        | SF2170  | -        | SSO2156  |
| <i>yehB</i>   | putative outer membrane protein                         | SDY2287  | SF2171  | -        | SSO2158* |
| <i>yehC</i>   | putative chaperone                                      | -        | SF2174* | -        | SSO2159  |
| <i>yehD</i>   | putative fimbrial-like protein                          | -        | SF2175  | -        | SSO2160  |
| <i>Z3596</i>  | putative fimbrial-like protein                          | SDY2532  | SF2409  | SBO2372  | SSO2391  |
| <i>Z3597</i>  | putative minor fimbrial subunit                         | SDY2533  | SF2410  | SBO2373  | SSO2392  |
| <i>Z3598</i>  | putative fimbrial protein                               | SDY2534  | SF2411  | SBO2374  | -        |
| <i>yfcS</i>   | putative fimbrial chaperone                             | SDY2535  | SF2412* | SBO2375  | SSO2393  |
| <i>yfcU</i>   | PapC-like porin protein involved in fimbrial biogenesis | SDY2536* | SF2414* | SBO2376  | SSO2394  |
| <i>Z3601</i>  | putative fimbrial-like protein                          | SDY2538  | SF2415  | SBO2377* | SSO2395  |
| <i>yraH</i>   | putative fimbrial-like protein                          | -        | SF3178* | -        | -        |
| <i>yraI</i>   | putative chaperone                                      | -        | SF3181  | -        | -        |
| <i>yraJ</i>   | putative outer membrane protein                         | -        | SF3182* | SBO3240  | SSO3289  |
| <i>Z4965</i>  | putative fimbrial subunit                               | -        | -       | -        | -        |
| <i>Z4966</i>  | putative fimbrial protein                               | -        | -       | -        | -        |
| <i>Z4968m</i> | PapC-like porin protein involved in fimbrial biogenesis | SDY4570  | -       | -        | -        |
| <i>Z4969</i>  | putative fimbrial chaperone                             | -        | -       | -        | -        |
| <i>Z4971</i>  | putative major fimbrial subunit                         | -        | -       | -        | -        |
| <i>Z5220</i>  | putative fimbrial protein                               | -        | -       | -        | -        |
| <i>Z5221</i>  | putative fimbrial protein                               | -        | -       | -        | -        |

| Gene          | Product                                                                                     | Sd197    | Sf301   | Sb227    | Ss046    |
|---------------|---------------------------------------------------------------------------------------------|----------|---------|----------|----------|
| <i>Z5222</i>  | putative fimbrial usher                                                                     | -        | -       | -        | -        |
| <i>Z5223</i>  | putative fimbrial chaperone                                                                 | -        | -       | -        | -        |
| <i>Z5224</i>  | putative fimbrial chaperone                                                                 | -        | -       | -        | -        |
| <i>Z5225</i>  | putative major fimbrial subunit                                                             | -        | -       | -        | -        |
| <i>fimB</i>   | recombinase involved in phase variation; regulator for fimA                                 | -        | SF4210  | SBO4362  | -        |
| <i>fimE</i>   | recombinase involved in phase variation; regulator for fimA                                 | -        | SF4209  | SBO4363  | -        |
| <i>fimA</i>   | major type 1 subunit fimbrin (pilin)                                                        | -        | SF4208  | SBO4364  | -        |
| <i>fimI</i>   | fimbrial protein                                                                            | -        | SF4207  | SBO4365  | -        |
| <i>fimC</i>   | periplasmic chaperone, required for type 1 fimbriae                                         | -        | SF4206  | SBO4366  | -        |
| <i>fimD</i>   | outer membrane protein; export and assembly of type 1 fimbriae, interrupted                 | -        | SF4205* | SBO4367* | -        |
| <i>fimF</i>   | fimbrial morphology                                                                         | -        | SF4202  | SBO4368  | -        |
| <i>fimG</i>   | fimbrial morphology                                                                         | -        | SF4201  | SBO4369  | -        |
| <i>fimH</i>   | minor fimbrial subunit, D-mannose specific adhesin                                          | -        | SF4200  | SBO4370  | -        |
| <b>Others</b> |                                                                                             |          |         |          |          |
| <i>hlyE</i>   | hemolysin E                                                                                 | SDY1219* | SF1171* | SBO1890* | SSO1173* |
| <i>sohA</i>   | putative protease; htrA suppressor protein                                                  | -        | -       | -        | SSO3286* |
| <i>eaeH</i>   | attaching and effacing protein, pathogenesis factor                                         | -        | -       | SBO0222* | -        |
| <i>hipA</i>   | persistence to inhibition of murein or DNA biosynthesis, DNA-binding regulator              | -        | -       | -        | SSO1614* |
| <i>yheE</i>   | putative general secretion pathway for protein export (GSP)                                 | -        | -       | -        | -        |
| <i>yheF</i>   | putative general protein secretion protein                                                  | -        | -       | -        | -        |
| <i>yheG</i>   | putative general secretion pathway for protein export (GSP) (type II traffic warden ATPase) | -        | -       | -        | -        |
| <i>hofF</i>   | putative general protein secretion protein                                                  | -        | -       | -        | -        |
| <i>hofG</i>   | putative general protein secretion protein                                                  | -        | -       | -        | -        |
| <i>hofH</i>   | putative general protein secretion protein                                                  | -        | -       | -        | -        |
| <i>yheH</i>   | putative export protein for general secretion pathway (GSP)                                 | -        | -       | -        | -        |
| <i>yheI</i>   | putative export protein I for general secretion pathway (GSP)                               | -        | -       | -        | -        |
| <i>yheJ</i>   | putative export protein J for general secretion pathway (GSP)                               | -        | -       | -        | -        |
| <i>yheK</i>   | putative general protein secretion protein                                                  | -        | -       | -        | -        |
| <i>pshM</i>   | putative general secretion                                                                  | -        | -       | -        | -        |
